# Supplementary material for: The Efficacy of Acupuncture on Tic Disorders in Children: A Retrospective and Propensity Score-Matched Study
Source: Front Pediatr. 2021 Nov 4;9:745212. doi: 10.3389/fped.2021.745212 (PMC8600324; doi:10.3389/fped.2021.745212)
Supplement: Supplementary file 1 [file Table_1.XLSX]

## Sheet: Sheet1
group	number	age	sex	diagnosis	address	heredity	farther	mother	the structure of family	height	weight	BMI	YGTSS	motor	vocal	impairment	1month	motor	vocal	impairment	3month	motor	vocal	impairment	index	grade	differnce	motor	vocal	impairment
ACWCT	1	6	male	PTD	1	0	1	1	1	1.2	25	17.3611	22	14	8	0	25	10	5	10	3	3	0	0	0.863636	3	19	11	8	0
CT	2	8	male	PTD	0	0	1	1	1	1.42	38	18.8455	17	7	0	10	16	6	0	10	2	2	0	0	0.88	3	15	5	0	10
ACWCT	3	10	male	PTD	0	0	1	1	1	1.5	45	20	21	11	0	10	24	8	6	10	8	8	0	0	0.619048	2	13	3	0	10
ACWCT	4	11	male	PTD	0	0	1	0	1	1.56	50	20.5457	22	0	12	10	7	0	7	0	5	0	5	0	0.772727	3	17	0	7	10
CT	5	11	female	TS	1	0	0	0	1	1.6	54	21.0937	25	12	3	10	13	10	3	0	10	7	3	0	0.6	2	15	5	0	10
CT	6	8	female	PTD	0	0	1	1	1	1.35	34	18.6557	19	9	0	10	3	3	0	0	0	0	0	0	1	4	19	9	0	10
ACWCT	7	8	female	TS	1	0	1	1	1	1.4	37	18.8776	20	10	0	10	20	10	0	10	3	3	0	0	0.85	3	17	7	0	10
ACWCT	8	6	male	TS	1	0	1	1	1	1.25	28	17.92	20	10	0	10	19	3	6	10	3	0	3	0	0.85	3	17	10	-3	10
ACWCT	9	9	male	PTD	1	0	1	1	1	1.47	43	19.8991	32	12	10	10	28	10	8	10	17	4	3	10	0.46875	2	15	8	7	0
ACWCT	10	10	male	TS	1	0	1	1	1	1.54	50	21.0828	31	14	7	10	3	3	0	0	0	0	0	0	1	4	31	14	7	10
CT	11	7	male	PTD	1	0	1	1	1	1.1	30	24.7934	20	10	0	10	13	0	3	10	0	0	0	0	1	4	20	10	0	10
CT	12	9	male	PTD	1	0	1	1	1	1.45	42.1	20.0238	20	10	0	10	18	8	0	10	4	4	0	0	0.8	3	16	6	0	10
CT	13	9	male	TS	1	0	0	1	1	1.5	44	19.5556	31	14	7	10	27	12	5	10	25	9	6	10	0.193548	1	6	5	1	0
CT	14	9	male	TS	0	0	1	1	1	1.36	37	20.0043	20	10	0	10	18	8	0	10	17	7	0	10	0.15	1	3	3	0	0
CT	15	9	male	TS	0	0	0	0	1	1.46	43	20.1726	28	11	7	10	25	10	5	10	9	6			0.678571	2	19	5	7	10
CT	16	9	male	TS	0	0	0	0	0	1.4	37	18.8776	33	16	7	10	29	14	5	10	22	5	7	10	0.333333	2	11	11	0	0
ACWCT	17	7	female	TS	1	0	1	0	1	1.23	31	20.4904	13	10	3	0	8	8	0	0	5	5	0	0	0.615385	2	8	5	3	0
CT	18	12	male	TS	0	0	0	1	1	1.58	51	20.4294	31	9	12	10	28	8	10	10	25	5	10	10	0.193548	1	6	4	2	0
ACWCT	19	6	female	TS	1	0	1	1	1	1.2	24	16.6667	26	11	5	10	18	8	0	10	0	0	0	0	1	4	26	11	5	10
ACWCT	20	7	male	PTD	0	0	1	1	1	1.33	32	18.0903	20	10	0	10	18	8	0	10	18	8	0	10	0.1	1	2	2	0	0
CT	21	11	male	TS	0	0	1	0	1	1.55	50	20.8117	24	11	3	10	20	10	0	10	5	5	0	0	0.791667	3	19	6	3	10
ACWCT	22	6	male	PTD	1	0	1	1	1	1.21	26	17.7583	20	10	0	10	5	5	0	0	0	0	0	0	1	4	20	10	0	10
CT	23	11	male	CTD	0	0	0	0	1	1.58	52	20.83	26	11	5	10	23	10	3	10	0	0	0	0	1	4	26	11	5	10
CT	24	10	male	CTD	0	0	1	1	1	1.47	48	22.213	18	3	5	10	15	0	5	10	3	3	0	0	0.833333	3	15	0	5	10
ACWCT	25	7	male	PTD	0	0	1	1	1	1.31	33	19.2296	23	8	5	10	18	4	4	10	20	5	5	10	0.130435	1	3	3	0	0
CT	26	12	female	CTD	0	0	0	0	1	1.54	46	19.3962	25	15	0	10	23	13	0	10	23	13	0	10	0.08	1	2	2	0	0
ACWCT	27	13	male	TS	0	0	0	0	1	1.62	52	19.8141	22	9	3	10	16	6	0	10	5	5	0	0	0.772727	3	17	4	3	10
CT	28	8	male	PTD	1	0	1	1	1	1.4	39	19.898	12	12	0	0	10	10	0	0	3	3	0	0	0.75	3	9	9	0	0
ACWCT	29	12	female	PTD	0	0	0	0	1	1.6	52	20.3125	20	9	1	10	10	8	2	0	3	3	0	0	0.85	3	17	6	1	10
ACWCT	30	8	male	TS	1	0	1	1	1	1.38	25	13.1275	35	15	10	10	30	12	8	10	10	5	5	0	0.714286	3	25	10	5	10
ACWCT	31	6	female	PTD	0	0	1	1	1	1.23	22	14.5416	28	12	6	10	23	10	3	10	16	6	0	10	0.428571	2	12	6	6	0
ACWCT	32	8	male	TS	0	0	1	1	1	1.35	30	16.4609	33	7	17	10	27	5	12	10	22	5	7	10	0.333333	2	11	2	10	0
ACWCT	33	7	female	TS	0	0	1	1	1	1.28	26	15.8691	25	12	3	10	10	10	0	0	5	5	0	0	0.8	3	20	7	3	10
ACWCT	34	12	female	TS	1	0	0	0	1	1.58	49	19.6283	46	19	17	10	34	12	12	10	20	10	0	10	0.565217	2	26	9	17	0
CT	35	7	male	PTD	1	0	1	1	1	1.27	25	15.5	29	15	4	10	22	12	0	10	3	3	0	0	0.896552	3	26	12	4	10
ACWCT	36	8	male	TS	1	0	1	1	1	1.3	30	17.7515	22	9	3	10	16	6	0	10	6	3	3	0	0.727273	3	16	6	0	10
CT	37	10	female	TS	0	0	1	1	1	1.44	37	17.8434	31	15	6	10	26	13	3	10	6	0	6	0	0.806452	3	25	15	0	10
ACWCT	38	6	male	PTD	1	0	1	1	1	1.2	23	15.9722	21	11	0	10	18	8	0	10	7	7	0	0	0.666667	2	14	4	0	10
ACWCT	39	6	male	PTD	1	0	1	1	1	1.26	28	17.6367	20	10	0	10	18	8	0	10	0	0	0	0	1	4	20	10	0	10
CT	40	13	male	TS	1	0	1	1	1	1.65	60	22.0386	22	0	12	10	20	0	10	10	20	0	10	10	0.0909091	1	2	0	2	0
ACWCT	41	10	female	PTD	1	0	1	1	1	1.45	38	18.0737	16	6	0	10	0	0	0	0	0	0	0	0	1	4	16	6	0	10
ACWCT	42	8	female	TS	1	0	1	1	1	1.3	25	14.7929	36	13	3	20	20	10	0	10	17	7	0	10	0.527778	2	19	6	3	10
CT	43	12	male	TS	1	0	1	1	1	1.6	50	19.5312	32	12	10	20	28	10	8	10	28	10	8	10	0.125	1	4	2	2	10
ACWCT	44	7	female	PTD	1	0	1	1	1	1.27	26	16.12	19	9	0	10	15	5	0	10	0	0	0	0	1	4	19	9	0	10
ACWCT	45	7	male	PTD	1	0	1	1	0	1.26	24	15.1172	26	9	7	10	20	5	5	10	0	0	0	0	1	4	26	9	7	10
CT	46	8	male	PTD	0	0	0	0	1	1.36	36	19.4637	22	0	12	10	18	0	8	10	5	0	5	0	0.772727	3	17	0	7	10
ACWCT	47	6	male	PTD	1	0	0	1	1	1.21	23	15.7093	19	9	0	10	16	6	0	10	3	3	0	0	0.842105	3	16	6	0	10
CT	48	7	male	PTD	1	0	1	1	10	1.34	32	17.8213	23	10	3	10	11	7	4	0	5	2	3	0	0.782609	3	18	8	0	10
CT	49	9	male	TS	0	0	0	0	1	1.32	31	17.7916	35	15	0	20	23	13	0	10	5	5	0	0	0.857143	3	30	10	0	20
CT	50	7	female	PTD	1	0	1	1	1	1.23	21	13.8806	28	10	8	10	12	6	6	0	6	6	0	0	0.785714	3	22	4	8	10
CT	51	9	male	PTD	0	0	0	0	1	1.5	43	19.1111	22	12	0	10	20	10	0	10	5	5	0	0	0.772727	3	17	7	0	10
ACWCT	52	9	male	TS	0	0	0	0	1	1.3	33	19.5266	31	18	3	10	24	14	0	10	19	0	9	10	0.387097	2	12	18	-6	0
ACWCT	53	10	male	PTD	0	0	1	1	1	1.57	42.5	17.2421	28	18	0	10	20	10	0	10	8	8	0	0	0.714286	3	20	10	0	10
ACWCT	54	9	male	CTD	1	0	1	1	1	1.42	40	19.8373	18	8	0	10	15	5	0	10	5	5	0	0	0.722222	3	13	3	0	10
CT	55	12	male	TS	0	0	0	0	1	1.65	60	22.0386	28	8	10	10	20	5	5	10	20	3	7	10	0.285714	1	8	5	3	0
ACWCT	56	9	female	CTD	1	0	1	0	1	1.46	42	19.7035	24	14	0	10	10	10	0	10	0	0	0	0	1	4	24	14	0	10
ACWCT	57	9	male	PTD	1	0	1	1	1	1.43	42	20.5389	23	10	3	10	18	8	0	10	5	5	0	0	0.782609	3	18	5	3	10
ACWCT	58	13	female	TS	1	0	1	1	1	1.65	58	21.3039	28	8	10	10	20	5	5	10	8	4	4	0	0.714286	3	20	4	6	10
ACWCT	59	6	male	PTD	0	0	1	1	1	1.22	24	16.1247	29	13	6	10	22	9	3	10	0	0	0	0	1	4	29	13	6	10
CT	60	11	male	PTD	0	0	1	1	1	1.42	32	15.8699	20	0	10	10	18	0	8	10	19	0	9	10	0.05	1	1	0	1	0
ACWCT	61	7	male	PTD	0	0	1	1	0	1.34	32	17.8213	28	8	10	10	22	12	0	10	25	8	7	10	0.107143	1	3	0	3	0
ACWCT	62	8	male	PTD	0	0	0	0	0	1.41	38	19.1137	27	17	0	10	20	10	0	10	17	7	0	10	0.37037	2	10	10	0	0
CT	63	6	male	PTD	1	0	0	0	1	1.3	37	21.8935	17	7	0	10	17	7	0	10	6	6	0	0	0.647059	2	11	1	0	10
CT	64	8	female	TS	0	0	1	1	1	1.33	32	18.0903	38	17	11	10	33	15	8	10	6	6	0	0	0.842105	3	32	11	11	10
ACWCT	65	8	male	PTD	0	0	1	1	1	1.32	30	17.2176	35	16	9	10	28	12	6	10	8	8	0	0	0.771429	3	27	8	9	10
ACWCT	66	6	male	PTD	1	0	1	1	1	1.22	24	16.1247	10	6	4	0	0	0	0	0	0	0	0	0	1	4	10	6	4	0
ACWCT	67	6	male	PTD	1	0	1	1	1	1.2	23	15.9722	22	12	0	10	21	11	0	10	7	7	0	0	0.681818	2	15	5	0	10
ACWCT	68	8	male	CTD	1	0	1	1	1	1.32	31	17.7916	19	9	0	10	5	5	0	0	0	0	0	0	1	4	19	9	0	10
ACWCT	69	6	male	TS	0	0	1	1	1	1.24	24	15.6087	31	9	12	10	8	4	4	0	0	0	0	0	1	4	31	9	12	10
ACWCT	70	11	male	CTD	1	0	1	1	1	1.58	51	20.4294	18	8	0	10	6	6	0	0	0	0	0	0	1	4	18	8	0	10
ACWCT	71	10	female	PTD	1	0	1	1	0	1.48	48	21.9138	23	10	3	10	20	10	0	10	5	5	0	0	0.782609	3	18	5	3	10
CT	72	7	female	PTD	1	0	1	1	1	1.3	31	18.3432	20	10	0	10	18	8	0	10	0	0	0	0	1	4	20	10	0	10
CT	73	9	male	TS	0	0	0	0	1	1.48	43	19.6311	22	12	0	10	20	10	0	10	0	0	0	0	1	4	22	12	0	10
CT	74	7	male	PTD	0	0	1	1	1	1.27	26	16.12	22	8	4	10	5	5	0	0	5	5	0	0	0.772727	3	17	3	4	10
CT	75	10	male	CTD	1	0	1	1	1	1.52	47	20.3428	24	10	4	10	6	6	0	0	0	0	0	0	1	4	24	10	4	10
ACWCT	76	6	male	PTD	1	0	1	1	1	1.53	48	20.5049	38	16	12	10	36	14	12	10	5	5	0	0	0.868421	3	33	11	12	10
ACWCT	77	9	male	CTD	1	1	1	1	1	1.44	36	17.3611	30	11	9	10	20	10	0	10	0	0	0	0	1	4	30	11	9	10
CT	78	12	male	CTD	1	1	0	0	1	1.55	50	20.8117	9	9	0	0	6	0	0		20	10	0	10	-1.22222	1	-11	-1	0	-10
CT	79	8	male	CTD	0	0	1	1	0	1.34	36	20.049	21	11	0	10	20	10	0	10	5	5	0	0	0.761905	3	16	6	0	10
ACWCT	80	11	male	TS	1	0	1	1	1	1.53	45	19.2234	22	12	0	10	7	7	0	0	5	5	0	0	0.772727	3	17	7	0	10
ACWCT	81	8	male	PTD	1	0	1	1	1	1.32	33	18.9394	26	10	6	10	24	8	6	10	14	8	6	0	0.461538	2	12	2	0	10
ACWCT	82	11	male	TS	0	0	1	1	1	1.56	48	19.7239	34	14	10	10	31	12	9	10	29	10	9	10	0.147059	1	5	4	1	0
ACWCT	83	10	male	TS	1	0	1	1	1	1.52	48	20.7756	26	12	4	10	26	12	4	10	11	7	4	0	0.576923	2	15	5	0	10
ACWCT	84	9	male	PTD	1	0	1	1	1	1.38	34	17.8534	32	12	0	20	18	8	0	10	5	5	0	0	0.84375	3	27	7	0	20
ACWCT	85	11	male	PTD	1	0	1	1	1	1.5	43	19.1111	37	10	17	10	37	10	17	10	16	8	8	0	0.567568	2	21	2	9	10
CT	86	6	male	CTD	0	0	0	0	1	1.26	28	17.6367	21	11	0	10	5	5	0	0	0	0	0	0	1	4	21	11	0	10
ACWCT	87	8	male	CTD	1	0	1	1	1	1.28	25	15.2588	32	12	10	10	18	10	8	0	7	7	0	0	0.78125	3	25	5	10	10
ACWCT	88	6	male	PTD	1	0	1	1	1	1.18	22	15.8001	14	14	0	0	8	8	0	0	10	10	0	0	0.285714	1	4	4	0	0
ACWCT	89	9	male	PTD	1	0	1	1	1	1.49	42	18.9181	31	13	8	10	13	8	5	0	10	5	5	0	0.677419	2	21	8	3	10
CT	90	8	male	PTD	0	0	0	0	1	1.38	37	19.4287	19	9	0	10	5	5	0	0	0	0	0	0	1	4	19	9	0	10
CT	91	8	male	PTD	0	0	0	0	1	1.3	26	15.3846	25	12	3	10	5	5	0	0	0	0	0	0	1	4	25	12	3	10
CT	92	10	male	PTD	0	0	0	1	1	1.52	50	21.6413	23	11	2	10	5	5	0	0	0	0	0	0	1	4	23	11	2	10
CT	93	9	male	PTD	0	0	1	1	1	1.44	39	18.8079	18	8	0	10	17	7	0	10	3	3	0	0	0.833333	3	15	5	0	10
CT	94	8	male	PTD	1	0	1	1	1	1.31	26	15.1506	23	9	4	10	8	5	3	0	7	4	3	0	0.695652	2	16	5	1	10
CT	95	7	male	PTD	1	0	1	1	1	1,26	26	16.38	21	11	0	10	19	9	0	10	10	5	5	0	0.52381	2	11	6	-5	10
CT	96	6	male	TS	0	0	1	1	1	1.18	24	17.2364	22	7	5	10	22	7	5	10	22	7	5	10	0	1	0	0	0	0
ACWCT	97	7	male	PTD	0	0	1	1	1	1.18	20	14.3637	23	9	4	10	22	8	4	10	0	0	0	0	1	4	23	9	4	10
ACWCT	98	9	male	TS	1	0	1	1	1	1.45	45	21.4031	24	9	5	10	19	9	0	10	5	5	0	0	0.791667	3	19	4	5	10
ACWCT	99	6	male	PTD	0	0	1	1	1	1.2	23	15.9722	22	12	0	10	5	5	0	0	0	0	0	0	1	4	22	12	0	10
CT	100	9	male	PTD	1	0	1	1	1	1.4	42	21.4286	16	6	0	10	0	0	0	0	0	0	0	0	1	4	16	6	0	10
CT	101	7	male	PTD	0	0	1	1	1	1.24	23	14.9584	18	4	4	10	6	3	3	0	0	0	0	0	1	4	18	4	4	10
CT	102	9	male	TS	0	0	0	0	1	1.38	32	16.8032	19	6	3	10	19	6	3	10	5	5	0	0	0.736842	3	14	1	3	10
CT	103	12	male	CTD	1	0	1	1	1	1.6	54	21.0937	24	0	14	10	22	0	12	10	16	0	6	10	0.333333	2	8	0	8	0
ACWCT	104	8	male	TS	1	0	1	1	1	1.41	31	15.5928	26	11	5	10	21	11	0	10	20	10	0	10	0.230769	1	6	1	5	0
CT	105	8	male	TS	1	0	0	1	1	1.38	38	19.9538	40	15	15	10	33	13	10	10	10	5	5	0	0.75	3	30	10	10	10
ACWCT	106	8	male	TS	1	0	1	1	1	1.31	27	15.7333	30	6	14	10	21	3	8	10	15	5	0	10	0.5	2	15	1	14	0
CT	107	6	male	PTD	1	0	1	1	1	1.29	29	17.4268	27	11	6	10	23	9	4	10	0	0	0	0	1	4	27	11	6	10
CT	108	6	male	PTD	1	1	1	1	1	1.3	29	17.1598	20	10	0	10	18	8	0	10	0	0	0	0	1	4	20	10	0	10
ACWCT	109	8	male	CTD	1	0	1	1	0	1.33	40	22.6129	18	8	0	10	5	5	0	0	5	5	0	0	0.722222	3	13	3	0	10
CT	110	14	male	TS	1	0	1	1	1	1.72	85	28.7317	25	10	5	10	23	8	5	10	5	5	0	0	0.8	3	20	5	5	10
CT	111	10	male	PTD	1	0	1	1	1	1.51	40	17.5431	27	10	7	10	21	5	6	10	10	5	5	0	0.62963	2	17	5	2	10
ACWCT	112	8	male	TS	1	0	0	0	1	1.32	30	17.2176	26	8	8	10	0	0	0	0	0	0	0	0	1	4	26	8	8	10
CT	113	6	male	PTD	1	0	1	1	1	1.24	24	15.6087	21	11	0	10	19	9	0	10	3	3	0	0	0.857143	3	18	8	0	10
CT	114	7	male	PTD	1	0	1	1	1	1.23	22	14.5416	7	7	0	0	5	5	0	0	4	4	0	0	0.428571	2	3	3	0	0
ACWCT	115	6	female	PTD	1	0	1	1	1	1.18	20	14.3637	17	7	0	10	5	5	0	0	3	3	0	0	0.823529	3	14	4	0	10
CT	116	6	male	PTD	1	0	1	1	1	1.3	25	14.7929	17	7	10	0	10	3	7	0	3	0	3	0	0.823529	3	14	7	7	0
CT	117	8	female	PTD	1	0	1	1	1	1.36	36	19.4637	24	8	6	10	14	7	7	0	16	8	8	0	0.333333	2	8	0	-2	10
CT	118	7	male	PTD	0	0	1	1	1	1.39	20	10.3514	9	9	0	0	7	7	0	0	4	4	0	0	0.555556	2	5	5	0	0
ACWCT	119	9	male	CTD	0	0	1	1	1	1.41	41	20.6227	29	12	7	10	22	12	0	10	3	3	0	0	0.896552	3	26	9	7	10
ACWCT	120	12	female	PTD	1	1	1	1	1	1.54	36	15.1796	19	9	0	10	18	8	0	10	4	4	0	0	0.789474	3	15	5	0	10
CT	121	10	male	TS	1	0	0	0	1	1.46	40	18.7652	21	11	0	10	5	5	0	0	8	5	3	0	0.619048	2	13	6	-3	10
CT	122	8	male	PTD	1	0	1	0	1	1.4	32	16.3265	20	10	0	10	17	7	0	10	6	6	0	0	0.7	2	14	4	0	10
CT	123	6	male	TS	0	0	0	0	1	1.25	26	16.64	29	11	8	10	21	7	4	10	21	7	4	10	0.275862	1	8	4	4	0
CT	124	12	male	TS	1	0	0	0	1	1.42	34	16.8617	27	7	10	10	22	5	7	10	5	0	5	0	0.814815	3	22	7	5	10
ACWCT	125	6	male	TS	1	0	1	1	1	1.2	22	15.2778	32	13	9	10	23	10	3	10	8	8	0	0	0.75	3	24	5	9	10
CT	126	10	male	TS	1	0	0	0	1	1.5	42	18.6667	24	3	11	10	21	0	11	10	21	0	11	10	0.125	1	3	3	0	0
CT	127	12	male	TS	0	0	1	1	1	1.5	39	17.3333	35	12	13	10	35	12	13	10	30	10	10	10	0.142857	1	5	2	3	0
CT	128	9	male	PTD	1	0	1	1	1	1.53	60	25.6312	18	8	0	10	5	5	0	0	0	0	0	0	1	4	18	8	0	10
CT	129	8	male	CTD	1	0	0	0	1	1.4	38	19.3878	18	8	0	10	18	8	0	10	21	11	0	21	-0.166667	1	-3	-3	0	-11
CT	130	9	male	PTD	1	0	0	0	1	1.42	47	23.3089	22	8	4	10	22	8	4	10	5	5	0	0	0.772727	3	17	3	4	10
ACWCT	131	6	male	PTD	0	0	1	1	1	1.18	26	18.6728	20	10	0	10	20	10	0	10	20	10	0	10	0	1	0	0	0	0
CT	132	10	male	PTD	1	0	1	0	1	1.49	53.5	24.098	18	8	0	10	18	8	0	10	20	10	0	10	-0.111111	1	-2	-2	0	0
CT	133	6	female	PTD	1	0	1	1	1	1.16	25	18.5791	18	8	0	10	18	8	0	10	5	5	0	0	0.722222	3	13	3	0	10
ACWCT	134	11	male	TS	1	0	1	1	1	1.58	48	19.2277	37	16	11	10	30	12	8	10	0	0	0	0	1	4	37	16	11	10
CT	135	6	female	PTD	1	1	1	0	1	1.21	27.6	18.8512	20	5	5	10	15	5	0	15	0	0	0	0	1	4	20	5	5	10
CT	136	8	male	PTD	1	0	1	1	1	1.3	25	14.7929	20	0	10	10	24	4	10	10	0	0	5	0	1	4	20	0	5	10
CT	137	8	male	PTD	0	0	1	1	1	1.33	28	15.829	9	9	0	0	0	0	0	0	6	6	0	0	0.333333	2	3	3	0	0
CT	138	8	male	TS	1	0	1	1	1	1.3	25	14.7929	28	16	2	10	22	10	2	10	5	5	0	0	0.821429	3	23	11	2	10
CT	139	7	female	PTD	0	0	1	0	1	1.4	30	15.3061	12	12	0	0	6	6	0	0	0	0	0	0	1	4	12	12	0	0
CT	140	8	female	PTD	1	0	1	1	1	1.28	20	12.207	9	9	0	0	7	7	0	0	9	9	0	0	0	1	0	0	0	0
CT	141	6	female	PTD	1	0	1	1	1	1.27	26	16.12	13	7	6	0	12	6	6	0	0	0	0	0	1	4	13	7	6	0
ACWCT	142	10	female	PTD	0	0	0	0	1	1.55	40	16.6493	24	4	10	10	0	0	0	0	0	0	0	0	1	4	24	4	10	10
CT	143	7	male	TS	0	1	1	1	1	1.25	25	16	33	8	15	10	9	0	9	0	0	0	9	0	1	4	33	8	6	10
CT	144	9	male	PTD	0	0	1	1	1	1.32	29	16.6437	19	9	0	10	19	9	0	10	6	0	6	0	0.684211	2	13	9	-6	10
CT	145	6	male	PTD	1	0	1	1	1	1.28	29	17.7002	19	9	0	10	0	0	0	0	0	0	0	0	1	4	19	9	0	10
ACWCT	146	8	female	CTD	1	0	1	1	1	1.38	28	14.7028	10	10	0	0	8	8	0	0	9	9	0	0	0.1	1	1	1	0	0
CT	147	9	male	PTD	1	0	1	1	1	1.35	32	17.5583	18	8	0	10	18	8	0	10	19	9	0	10	-0.0555556	1	-1	-1	0	0
ACWCT	148	12	male	CTD	0	0	0	0	1	1.6	41.5	16.2109	19	9	0	10	7	7	0	0	19	9	0	10	0	1	0	0	0	0
CT	149	6	female	PTD	1	0	1	1	1	1.21	22	15.0263	7	7	0	0	6	6	0	0	0	0	0	0	1	4	7	7	0	0
ACWCT	150		male	PTD	1	0	1	1	1	1.32	23	13.2002	23	13	0	10	5	5	0	0	3	3	0	0	0.869565	3	20	10	0	10
ACWCT	151	8	male	TS	0	0	1	0	1	1.38	40	21.004	23	7	6	10	10	5	5	0	6	3	3	0	0.73913	3	17	4	3	10
CT	152	6	female	PTD	0	0	1	1	1	1.2	21	14.5833	30	10	0	20	20	10	0	10	9	9	0	0	0.7	2	21	1	0	20
CT	153	6	male	CTD	1	0	1	1	1	1.16	21	15.6064	21	11	0	10	20	10	0	10	0	0	0	0	1	4	21	11	0	10
CT	154	7	female	PTD	1	0	1	1	1	1.24	23	14.9584	12	12	0	0	12	12	0	0	0	0	0	0	1	4	12	12	0	0
CT	155	6	male	PTD	0	0	1	1	1	1.18	24	17.2364	22	12	0	10	10	10	0	0	20	10	0	10	0.0909091	1	2	2	0	0
ACWCT	156	12	male	TS	1	0	1	1	1	1.65	50	18.3655	44	11	13	20	27	11	6	10	9	9	0	0	0.795455	3	35	2	13	20
CT	157	12	male	CTD	1	0	1	1	1	1.67	51	18.2868	30	11	9	10	8	0	8	0	9	0	9	0	0.7	2	21	11	0	10
CT	158	10	male	PTD	0	0	1	1	1	1.4	37	18.8776	22	12	0	10	7	7	0	0	0	0	0	0	1	4	22	12	0	10
CT	159	10	male	CTD	0	0	0	0	1	1.41	37	18.6107	20	0	10	10	20	0	10	10	18	0	8	10	0.1	1	2	0	2	0
CT	161	8	male	CTD	0	0	1	1	1	1.34	28	15.5937	11	11	0	0	20	10	0	10	15	5	0	10	-0.363636	1	-4	6	0	-10
ACWCT	162	7	male	PTD	0	0	1	1	1	1.26	25	15.747	26	12	4	10	18	8	0	10	5	5	0	0	0.807692	3	21	7	4	10
ACWCT	163	10	male	PTD	1	0	1	1	1	1.4	36	18.3673	48	15	13	20	7	0	7	0	0	0	0	0	1	4	48	15	13	20
ACWCT	164	8	male	TS	0	0	1	0	1	1.28	25	15.2588	27	5	12	10	27	5	12	10	0	0	0	0	1	4	27	5	12	10
ACWCT	165	6	male	PTD	1	0	1	1	1	1.3	26	15.3846	10	6	4	0	0	0	0	0	0	0	0	0	1	4	10	6	4	0
ACWCT	166	10	male	CTD	0	0	0	0	1	1.5	38.5	17.1111	12	12	0	0	5	5	0	0	0	0	0	0	1	4	12	12	0	0
CT	167	8	female	CTD	0	0	1	1	1	1.31	26	15.1506	18	13	5	0	15	10	5	0	10	10	0	0	0.444444	2	8	3	5	0
ACWCT	168	8	male	CTD	1	0	1	1	1	1.4	33	16.8367	20	10	0	10	16	6	0	10	0	0	0	0	1	4	20	10	0	10
CT	170	6	male	TS	1	0	1	1	1	1.16	20	14.8633	20	6	4	10	5	5	0	0	5	5	0	0	0.75	3	15	1	4	10
CT	171	7	female	PTD	0	0	1	1	1	1.24	23	14.9584	10	10	0	0	5	5	0	0	7	7	0	0	0.3	1	3	3	0	0
CT	172	6	male	PTD	1	0	1	1	1	1.24	32.5	21.1368	19	9	0	10	5	5	0	0	5	5	0	0	0.736842	3	14	4	0	10
ACWCT	173	12	male	PTD	1	0	1	1	1	1.43	46	22.495	11	11	0	0	9	9	0	0	10	10	0	0	0.0909091	1	1	1	0	0
ACWCT	174	6	female	PTD	1	0	1	1	1	1.23	22	14.5416	20	10	0	10	0	0	0	0	0	0	0	0	1	4	20	10	0	10
CT	175	7	male	TS	1	0	1	1	1	1.3	28	16.568	11	6	5	0	5	5	0	0	9	9	0	0	0.181818	1	2	-3	5	0
ACWCT	176	11	male	TS	0	0	0	0	1	1.53	52	22.2137	25	7	8	10	20	10	0	10	19	9	0	10	0.24	1	6	-2	8	0
ACWCT	177	6	female	PTD	1	0	1	1	1	1.17	22	16.0713	26	8	8	10	8	8	0	0	0	0	0	0	1	4	26	8	8	10
CT	178	6	male	PTD	0	0	1	1	1	1.25	26	16.64	20	10	0	10	15	5	0	10	15	5	0	10	0.25	1	5	5	0	0
CT	179	7	male	TS	0	0	1	1	1	1.13	21	16.4461	28	10	8	10	25	10	5	10	9	6	3	0	0.678571	2	19	4	5	10
CT	180	10	male	TS	0	0	1	0	1	1.3	25	14.7929	35	13	12	10	14	7	7	0	12	6	6	0	0.657143	2	23	7	6	10
CT	181	6	female	PTD	0	0	0	0	1	1.16	20	14.8633	21	11	0	10	21	11	0	10	7	7	0	0	0.666667	2	14	4	0	10
ACWCT	182	9	male	CTD	0	0	0	0	1	1.47	40	18.5108	26	13	3	10	10	10	0	0	5	5	0	0	0.807692	3	21	8	3	10
CT	183	8	male	TS	0	0	0	0	1	1.3	26	15.3846	33	13	10	10	31	11	10	10	20	10	0	10	0.393939	2	13	3	10	0
ACWCT	184	11	male	TS	0	0	1	1	1	1.46	49	22.9874	34	12	12	10	16	10	6	0	12	6	6	0	0.647059	2	22	6	6	10
ACWCT	185	10	male	TS	1	0	1	1	1	1.41	26	13.0778	33	12	11	10	29	10	9	10	13	8	5	0	0.606061	2	20	4	6	10
ACWCT	186	6	female	PTD	0	0	1	1	1	1.15	21	15.879	25	8	7	10	12	6	6	0	6	6	0	0	0.76	3	19	2	7	10
CT	187	6	male	PTD	1	0	1	1	1	1.18	22.5	16.1591	15	5	0	10	0	0	0	0	0	0	0	0	1	4	15	5	0	10
CT	188	7	female	PTD	0	0	1	1	1	1.3	27	15.9763	19	9	0	10	21	11	0	10	20	10	0	10	-0.0526316	1	-1	-1	0	0
CT	190	8	male	PTD	0	0	1	1	1	1.38	30	15.753	18	8	0	10	0	0	0	0	6	6	0	0	0.666667	2	12	2	0	10
CT	191	7	female	PTD	1	0	0	1	1	1.32	30	17.2176	21	11	0	10	9	9	0	0	5	5	0	0	0.761905	3	16	6	0	10
ACWCT	192	6	male	PTD	0	0	1	1	1	1.2	25	17.3611	20	10	0	10	20	10	0	10	0	0	0	0	1	4	20	10	0	10
CT	193	10	male	PTD	1	0	1	0	1	1.49	53.5	24.098	18	8	0	10	20	10	0	10	7	0	7	0	0.611111	2	11	8	-7	10
CT	194	9	male	PTD	1	1	1	1	1	1.44	28	13.5031	18	8	0	10	17	7	0	10	14	7	7	0	0.222222	1	4	1	-7	10
ACWCT	195	11	male	TS	0	1	1	1	1	1.5	45	20	15	9	6	0	9	9	0	0	7	7	0	0	0.533333	2	8	2	6	0
CT	196	12	male	TS	0	0	0	0	1	1.5	38	16.8889	35	11	14	10	18	9	9	0	7	0	7	0	0.8	3	28	11	7	10
CT	197	10	male	PTD	0	0	0	0	1	1.36	43	23.2483	29	12	7	10	20	10	0	10	6	6	0	0	0.793103	3	23	6	7	10
CT	198	7	female	PTD	0	0	0	0	1	1.34	25	13.9229	36	8	8	20	19	0	9	10	0	0	0	0	1	4	36	8	8	20
CT	200	12	male	TS	1	0	1	1	1	1.68	60	21.2585	29	12	7	10	15	8	7	0	12	8	4	0	0.586207	2	17	4	3	10
ACWCT	201	6	male	PTD	0	0	1	1	1	1.23	31	20.4904	22	12	0	10	16	6	0	10	0	0	0	0	1	4	22	12	0	10
ACWCT	202	8	female	PTD	1	0	1	1	1	1.39	38	19.6677	20	10	0	10	7	7	0	0	5	5	0	0	0.75	3	15	5	0	10
CT	203	8	male	CTD	1	0	0	0	1	1.38	37	19.4287	20	10	0	10	22	12	0	10	20	10	0	10	0	1	0	0	0	0
ACWCT	204	7	male	PTD	1	1	1	1	1	1.28	26	15.8691	25	12	3	10	5	5	0	0	7	7	0	0	0.72	3	18	5	3	10
CT	205	6	male	TS	1	0	1	1	0	1.26	27	17.0068	31	12	9	10	8	4	4	0	0	0	0	0	1	4	31	12	9	10
ACWCT	206	7	female	PTD	1	0	1	1	1	1.3	30	17.7515	20	10	0	10	4	4	0	0	0	0	0	0	1	4	20	10	0	10
CT	207	8	male	PTD	1	1	1	1	1	1.4	37.5	19.1327	20	10	0	10	17	7	0	10	8	8	0	0	0.6	2	12	2	0	10
CT	208	6	female	PTD	1	0	1	1	1	1.26	28	17.6367	24	8	6	10	32	11	11	10	23	7	6	10	0.0416667	1	1	1	0	0
CT	209	6	male	PTD	0	0	1	1	1	1.25	26	16.64	23	13	0	10	5	5	0	0	21	11	0	10	0.0869565	1	2	2	0	0
CT	210	11	male	PTD	0	0	1	1	1	1.57	55	22.3133	20	0	10	10	12	7	5	0	19	9	0	10	0.05	1	1	-9	10	0
ACWCT	211	9	male	PTD	1	1	1	1	1	1.49	42	18.9181	21	11	0	10	5	5	0	0	5	5	0	0	0.761905	3	16	6	0	10
ACWCT	212	6	male	PTD	1	0	1	1	1	1.27	27	16.74	21	11	0	10	8	4	4	0	0	0	0	0	1	4	21	11	0	10
ACWCT	213	11	male	TS	1	0	1	1	0	1.6	54	21.0937	28	13	5	10	8	8	0	0	0	0	0	0	1	4	28	13	5	10
CT	214	6	male	PTD	0	0	0	0	1	1.26	27	17.0068	29	12	7	10	12	8	2	0	5	5	0	0	0.827586	3	24	7	7	10
CT	215	9	male	PTD	1	0	1	1	1	1.48	41	18.718	26	6	10	10	15	7	8	0	8	0	8	0	0.692308	2	18	6	2	10
ACWCT	216	8	male	TS	1	1	1	1	1	1.4	35	17.8571	19	9	10	0	10	5	5	0	0	0	0	0	1	4	19	9	10	0
CT	217	8	male	TS	1	0	1	1	1	1.43	36	17.6048	16	12	4	0	16	12	4	0	12	8	4	0	0.25	1	4	4	0	0
ACWCT	218	7	male	TS	1	0	1	1	1	1.37	32	17.0494	31	9	12	10	20	5	5	10	10	5	5	0	0.677419	2	21	4	7	10
ACWCT	219	10	male	TS	1	0	1	1	1	1.5	44	19.5556	20	10	0	10	7	7	0	0	5	5	0	0	0.75	3	15	5	0	10
ACWCT	220	9	male	PTD	0	0	1	0	1	1.4	47.5	24.2347	35	11	4	20	6	6	0	0	0	0	0	0	1	4	35	11	4	20
CT	221	9	male	TS	0	0	0	0	1	1.42	40	19.8373	28	10	8	10	24	8	6	10	31	11	10	10	-0.107143	1	-3	-1	-2	0
ACWCT	222	11	male	PTD	0	0	0	0	1	1.56	48	19.7239	20	10	0	10	7	7	0	0	3	3	0	0	0.85	3	17	7	0	10
ACWCT	223	11	female	PTD	1	0	1	1	0	1.6	49	19.1406	24	3	11	10	0	0	0	0	0	0	0	0	1	4	24	3	11	10
ACWCT	224	13	female	PTD	0	0	1	1	0	1.62	51	19.433	27	13	4	10	14	7	7	0	0	0	0	0	1	4	27	13	4	10
CT	225	8	male	TS	0	0	1	1	1	1.37	33	17.5822	20	10	0	10	24	9	5	10	0	0	0	0	1	4	20	10	0	10
ACWCT	226	8	male	PTD	1	0	1	1	1	1.32	25	14.348	22	12	0	10	18	8	0	10	5	5	0	0	0.772727	3	17	7	0	10
ACWCT	227	14	male	TS	1	0	0	1	1	1.73	61	20.3816	30	12	8	10	20	10	0	10	12	7	5	0	0.6	2	18	5	3	10
ACWCT	228	6	male	TS	0	0	1	1	1	1.26	28	17.6367	33	8	15	10	7	7	0	0	5	5	0	0	0.848485	3	28	3	15	10
ACWCT	229	6	female	TS	1	0	1	1	1	1.23	24	15.8636	21	11	0	10	17	9	8	0	3	3	0	0	0.857143	3	18	8	0	10
CT	230	7	male	TS	0	1	1	1	1	1.22	25	16.7966	30	11	9	10	19	0	9	10	13	5	8	0	0.566667	2	17	6	1	10
ACWCT	231	9	male	TS	1	0	1	1	1	1.4	30	15.3061	45	11	14	20	34	10	14	10	11	3	8	0	0.755556	3	34	8	6	20
ACWCT	232	10	male	PTD	1	0	1	1	1	1.46	49	22.9874	22	12	0	10	8	8	0	0	5	5	0	0	0.772727	3	17	7	0	10
ACWCT	233	8	male	TS	1	0	1	1	1	1.4	33	16.8367	26	8	8	10	20	6	4	10	5	5	0	0	0.807692	3	21	3	8	10
CT	234	8	female	PTD	1	0	1	1	1	1.36	32	17.301	22	12	0	10	22	5	7	10	6	6	0	0	0.727273	3	16	6	0	10
ACWCT	235	10	male	CTD	1	0	1	1	1	1.52	44	19.0443	10	10	0	0	10	10	0	0	5	5	0	0	0.5	2	5	5	0	0
CT	236	9	male	PTD	0	0	0	1	1	1.5	45	20	22	12	0	10	5	5	0	0	5	5	0	0	0.772727	3	17	7	0	10
CT	237	9	female	TS	0	0	0	1	1	1.45	38	18.0737	46	13	13	20	34	12	12	10	15	8	7	0	0.673913	2	31	5	6	20
ACWCT	238	6	female	PTD	1	0	1	1	1	1.25	25	16	31	12	9	10	19	9	0	10	3	3	0	0	0.903226	3	28	9	9	10
ACWCT	239	10	male	TS	1	0	1	1	1	1.45	49	23.3056	31	14	7	10	29	10	9	10	8	5	3	0	0.741935	3	23	9	4	10
ACWCT	240	8	female	PTD	1	0	0	0	0	1.4	38	19.3878	39	15	14	10	34	12	12	10	12	9	3	0	0.692308	2	27	6	11	10
CT	241	12	male	PTD	1	0	1	1	0	1.65	70	25.7117	21	11	0	10	19	9	0	10	5	5	0	0	0.761905	3	16	6	0	10
ACWCT	242	6	male	PTD	1	0	1	1	1	1.2	22	15.2778	29	10	9	10	20	10	10	0	8	5	3	0	0.724138	3	21	5	6	10
ACWCT	243	7	female	PTD	0	0	1	1	1	1.36	32	17.301	25	8	7	10	12	6	6	0	3	3	0	0	0.88	3	22	5	7	10
CT	244	8	male	PTD	1	0	1	1	1	1.4	33	16.8367	19	11	8	0	15	10	5	0	8	8	0	0	0.578947	2	11	3	8	0
ACWCT	245	9	male	TS	0	0	0	0	0	1.4	25	12.7551	28	10	8	10	26	9	7	10	5	5	0	0	0.821429	3	23	5	8	10
ACWCT	246	8	male	TS	1	1	1	1	1	1.46	36	16.8887	23	10	3	10	19	9	0	10	5	5	0	0	0.782609	3	18	5	3	10
CT	247	14	male	CTD	0	0	1	1	1	1.68	62	21.9671	22	12	0	10	20	10	0	10	8	8	0	0	0.636364	2	14	4	0	10
CT	248	9	female	PTD	0	0	0	0	1	1.3	25.6	15.1479	21	11	0	10	19	9	0	10	5	5	0	0	0.761905	3	16	6	0	10
CT	249	6	male	TS	0	1	1	1	1	1.28	30	18.3105	45	10	15	20	30	10	10	10	26	8	8	10	0.422222	2	19	2	7	10
CT	250	11	male	PTD	1	0	1	1	1	1.5	35	15.5556	26	0	16	10	22	0	12	10	8	0	8	0	0.692308	2	18	0	8	10
ACWCT	251	6	male	PTD	1	0	1	1	1	1.1	20	16.5289	21	11	0	10	19	9	0	10	3	3	0	0	0.857143	3	18	8	0	10
ACWCT	252	12	male	TS	1	0	1	0	1	1.6	50	19.5312	43	10	13	20	39	9	10	20	10	5	5	0	0.767442	3	33	5	8	20
ACWCT	253	9	male	PTD	1	0	1	1	1	1.35	25	13.7174	27	13	4	10	22	12	0	10	5	5	0	0	0.814815	3	22	8	4	10
ACWCT	254	8	male	TS	1	0	1	0	1	1.2	18	12.5	24	11	3	10	18	8	0	10	3	3	0	0	0.875	3	21	8	3	10
